# Supplementary material for: deGPS is a powerful tool for detecting differential expression in RNA-sequencing studies
Source: PubMed Central journal article supplement (PMC4465298; doi:10.1186/s12864-015-1676-0), 2015-06-13
Supplement: 12864_2015_1676_MOESM1_ESM.pdf [file 12864_2015_1676_MOESM1_ESM.pdf]

**Table S1** TCGA samples used in microRNA-Seq simulations.

| order | sample_id                    | order | sample_id                    |
|-------|------------------------------|-------|------------------------------|
| 1     | TCGA-05-4244-01A-01T-1108-13 | 51    | TCGA-44-2656-01A-02T-0947-13 |
| 2     | TCGA-05-4249-01A-01T-1108-13 | 52    | TCGA-44-2657-01A-01T-1108-13 |
| 3     | TCGA-05-4250-01A-01T-1108-13 | 53    | TCGA-44-2659-01A-01T-0947-13 |
| 4     | TCGA-05-4382-01A-01T-1207-13 | 54    | TCGA-44-2661-01A-01T-1108-13 |
| 5     | TCGA-05-4384-01A-01T-1754-13 | 55    | TCGA-44-2662-01A-01T-0947-13 |
| 6     | TCGA-05-4389-01A-01T-1207-13 | 56    | TCGA-44-2665-01A-01T-0947-13 |
| 7     | TCGA-05-4390-01A-02T-1754-13 | 57    | TCGA-44-2666-01A-01T-0947-13 |
| 8     | TCGA-05-4395-01A-01T-1207-13 | 58    | TCGA-44-2668-01A-01T-0947-13 |
| 9     | TCGA-05-4396-01A-21H-1857-13 | 59    | TCGA-44-3396-01A-01T-1207-13 |
| 10    | TCGA-05-4397-01A-01T-1207-13 | 60    | TCGA-44-3398-01A-01T-1108-13 |
| 11    | TCGA-05-4398-01A-01T-1207-13 | 61    | TCGA-44-3918-01A-01T-1108-13 |
| 12    | TCGA-05-4402-01A-01T-1207-13 | 62    | TCGA-44-3919-01A-02T-1108-13 |
| 13    | TCGA-05-4403-01A-01T-1207-13 | 63    | TCGA-44-4112-01A-01T-1108-13 |
| 14    | TCGA-05-4405-01A-21H-1857-13 | 64    | TCGA-44-5643-01A-01T-1627-13 |
| 15    | TCGA-05-4410-01A-21H-1857-13 | 65    | TCGA-44-5644-01A-21H-2038-13 |
| 16    | TCGA-05-4415-01A-22H-1857-13 | 66    | TCGA-44-5645-01A-01T-1627-13 |
| 17    | TCGA-05-4417-01A-22H-1857-13 | 67    | TCGA-44-6144-01A-11H-1754-13 |
| 18    | TCGA-05-4418-01A-01T-1207-13 | 68    | TCGA-44-6145-01A-11H-1754-13 |
| 19    | TCGA-05-4420-01A-01T-1207-13 | 69    | TCGA-44-6146-01A.r3          |
| 20    | TCGA-05-4422-01A-01T-1207-13 | 70    | TCGA-44-6147-01A.r3          |
| 21    | TCGA-05-4424-01A-22H-1857-13 | 71    | TCGA-44-6148-01A-11H-1754-13 |
| 22    | TCGA-05-4425-01A-01T-1754-13 | 72    | TCGA-44-6774-01A-21H-1857-13 |
| 23    | TCGA-05-4426-01A-01T-1207-13 | 73    | TCGA-44-6775-01A.r3          |
| 24    | TCGA-05-4427-01A-21H-1857-13 | 74    | TCGA-44-6776-01A-11H-1857-13 |
| 25    | TCGA-05-4430-01A-02T-1207-13 | 75    | TCGA-44-6777-01A-11H-1857-13 |
| 26    | TCGA-05-4432-01A-01T-1207-13 | 76    | TCGA-44-6778-01A-11H-1857-13 |
| 27    | TCGA-05-4433-01A-22H-1857-13 | 77    | TCGA-44-6779-01A-11H-1857-13 |
| 28    | TCGA-05-4434-01A-01T-1207-13 | 78    | TCGA-44-7659-01A-11H-2065-13 |
| 29    | TCGA-05-5420-01A-01T-1627-13 | 79    | TCGA-44-7660-01A-11H-2065-13 |
| 30    | TCGA-05-5423-01A-01T-1627-13 | 80    | TCGA-44-7661-01A-11H-2065-13 |
| 31    | TCGA-05-5425-01A-02T-1627-13 | 81    | TCGA-44-7662-01A-11H-2065-13 |
| 32    | TCGA-05-5428-01A-01T-1627-13 | 82    | TCGA-44-7667-01A-31H-2065-13 |
| 33    | TCGA-05-5429-01A-01T-1627-13 | 83    | TCGA-44-7669-01A-21H-2065-13 |
| 34    | TCGA-05-5715-01A-01T-1627-13 | 84    | TCGA-44-7670-01A-11H-2065-13 |
| 35    | TCGA-35-3615-01A-01T-0947-13 | 85    | TCGA-44-7671-01A-11H-2065-13 |
| 36    | TCGA-35-4122-01A-01T-1108-13 | 86    | TCGA-44-7672-01A-11H-2065-13 |
| 37    | TCGA-35-4123-01A-01T-1108-13 | 87    | TCGA-44-8117-01A-11H-2240-13 |
| 38    | TCGA-35-5375-01A-01T-1627-13 | 88    | TCGA-44-8119-01A-11H-2240-13 |
| 39    | TCGA-38-4625-01A-01T-1207-13 | 89    | TCGA-44-8120-01A-11H-2240-13 |
| 40    | TCGA-38-4626-01A-01T-1207-13 | 90    | TCGA-44-A479-01A-31H-A24G-13 |
| 41    | TCGA-38-4627-01A-01T-1207-13 | 91    | TCGA-44-A47A-01A-21H-A24G-13 |
| 42    | TCGA-38-4628-01A-01T-1207-13 | 92    | TCGA-44-A47B-01A-11H-A24G-13 |
| 43    | TCGA-38-4629-01A-02T-1207-13 | 93    | TCGA-44-A47F-01A-11H-A24G-13 |
| 44    | TCGA-38-4630-01A-01T-1207-13 | 94    | TCGA-44-A47G-01A-21H-A24G-13 |
| 45    | TCGA-38-4631-01A-01T-1754-13 | 95    | TCGA-44-A4SS-01A-11H-A24S-13 |
| 46    | TCGA-38-4632-01A-01T-1754-13 | 96    | TCGA-44-A4SU-01A-11H-A24S-13 |
| 47    | TCGA-38-6178-01A-11H-1754-13 | 97    | TCGA-49-4486-01A-01T-1207-13 |
| 48    | TCGA-38-7271-01A-11H-2038-13 | 98    | TCGA-49-4487-01A-21H-1857-13 |
| 49    | TCGA-38-A44F-01A-11H-A24G-13 | 99    | TCGA-49-4488-01A-01T-1754-13 |
| 50    | TCGA-44-2655-01A-01T-0947-13 | 100   | TCGA-49-4490-01A-21H-1857-13 |

| order | sample_id                    | order | sample_id                    |
|-------|------------------------------|-------|------------------------------|
| 101   | TCGA-49-4494-01A-01T-1207-13 | 151   | TCGA-55-1594-01A-01T-0947-13 |
| 102   | TCGA-49-4501-01A-01T-1207-13 | 152   | TCGA-55-1595-01A-01T-0947-13 |
| 103   | TCGA-49-4505-01A-01T-1207-13 | 153   | TCGA-55-1596-01A-01T-0947-13 |
| 104   | TCGA-49-4506-01A-01T-1207-13 | 154   | TCGA-55-5899-01A-11H-1627-13 |
| 105   | TCGA-49-4507-01A-01T-1207-13 | 155   | TCGA-55-6543-01A-11H-1754-13 |
| 106   | TCGA-49-4510-01A-01T-1207-13 | 156   | TCGA-55-6642-01A-11H-1857-13 |
| 107   | TCGA-49-4512-01A-21H-1857-13 | 157   | TCGA-55-6712-01A-11H-1857-13 |
| 108   | TCGA-49-4514-01A-21H-1857-13 | 158   | TCGA-55-6968-01A-11H-1948-13 |
| 109   | TCGA-49-6742-01A-11H-1857-13 | 159   | TCGA-55-6969-01A-11H-1948-13 |
| 110   | TCGA-49-6743-01A-11H-1857-13 | 160   | TCGA-55-6970-01A-11H-1948-13 |
| 111   | TCGA-49-6744-01A-11H-1857-13 | 161   | TCGA-55-6971-01A-11H-1948-13 |
| 112   | TCGA-49-6745-01A-11H-1857-13 | 162   | TCGA-55-6972-01A-11H-1948-13 |
| 113   | TCGA-49-6761-01A-31H-1948-13 | 163   | TCGA-55-6978-01A-11H-1948-13 |
| 114   | TCGA-49-6767-01A-11H-1857-13 | 164   | TCGA-55-6979-01A-11H-1948-13 |
| 115   | TCGA-50-5044-01A-21H-1857-13 | 165   | TCGA-55-6980-01A-11H-1948-13 |
| 116   | TCGA-50-5045-01A-01T-1627-13 | 166   | TCGA-55-6981-01A-11H-1948-13 |
| 117   | TCGA-50-5049-01A-01T-1627-13 | 167   | TCGA-55-6982-01A-11H-1948-13 |
| 118   | TCGA-50-5051-01A-21H-1857-13 | 168   | TCGA-55-6983-01A-11H-1948-13 |
| 119   | TCGA-50-5055-01A-01T-1627-13 | 169   | TCGA-55-6984-01A-11H-1948-13 |
| 120   | TCGA-50-5066-01A-01T-1627-13 | 170   | TCGA-55-6985-01A-11H-1948-13 |
| 121   | TCGA-50-5068-01A-01T-1627-13 | 171   | TCGA-55-6986-01A-11H-1948-13 |
| 122   | TCGA-50-5072-01A-21H-1857-13 | 172   | TCGA-55-6987-01A-11H-1948-13 |
| 123   | TCGA-50-5930-01A-11H-1754-13 | 173   | TCGA-55-7227-01A-11H-2038-13 |
| 124   | TCGA-50-5931-01A-11H-1754-13 | 174   | TCGA-55-7281-01A-11H-2038-13 |
| 125   | TCGA-50-5932-01A-11H-1754-13 | 175   | TCGA-55-7283-01A-11H-2038-13 |
| 126   | TCGA-50-5933-01A-11H-1754-13 | 176   | TCGA-55-7284-01B-11H-2240-13 |
| 127   | TCGA-50-5935-01A-11H-1754-13 | 177   | TCGA-55-7570-01A-11H-2038-13 |
| 128   | TCGA-50-5936-01A-11H-1627-13 | 178   | TCGA-55-7573-01A-11H-2038-13 |
| 129   | TCGA-50-5939-01A-11H-1627-13 | 179   | TCGA-55-7574-01A-11H-2038-13 |
| 130   | TCGA-50-5941-01A-11H-1754-13 | 180   | TCGA-55-7576-01A-11H-2065-13 |
| 131   | TCGA-50-5942-01A-21H-1754-13 | 181   | TCGA-55-7724-01A-11H-2169-13 |
| 132   | TCGA-50-5944-01A-11H-1754-13 | 182   | TCGA-55-7725-01A-11H-2169-13 |
| 133   | TCGA-50-5946-01A-11H-1754-13 | 183   | TCGA-55-7726-01A-11H-2169-13 |
| 134   | TCGA-50-6590-01A-12H-1857-13 | 184   | TCGA-55-7727-01A-11H-2169-13 |
| 135   | TCGA-50-6591-01A-11H-1754-13 | 185   | TCGA-55-7728-01A-11H-2186-13 |
| 136   | TCGA-50-6592-01A-11H-1754-13 | 186   | TCGA-55-7815-01A-11H-2169-13 |
| 137   | TCGA-50-6593-01A-11H-1754-13 | 187   | TCGA-55-7816-01A-11H-2169-13 |
| 138   | TCGA-50-6594-01A-11H-1754-13 | 188   | TCGA-55-7903-01A-11H-2169-13 |
| 139   | TCGA-50-6595-01A-12H-1857-13 | 189   | TCGA-55-7907-01A-11H-2169-13 |
| 140   | TCGA-50-6597-01A-11H-1857-13 | 190   | TCGA-55-7910-01A-11H-2169-13 |
| 141   | TCGA-50-6673-01A-11H-1948-13 | 191   | TCGA-55-7911-01A-11H-2169-13 |
| 142   | TCGA-50-7109-01A-11H-2038-13 | 192   | TCGA-55-7913-01B-11H-2240-13 |
| 143   | TCGA-50-8457-01A-11H-2325-13 | 193   | TCGA-55-7914-01A-11H-2169-13 |
| 144   | TCGA-50-8459-01A-11H-2325-13 | 194   | TCGA-55-7994-01A-11H-2186-13 |
| 145   | TCGA-50-8460-01A-11H-2325-13 | 195   | TCGA-55-7995-01A-11H-2186-13 |
| 146   | TCGA-53-7624-01A-11H-2065-13 | 196   | TCGA-55-8085-01A-11H-2240-13 |
| 147   | TCGA-53-7626-01A-12H-2065-13 | 197   | TCGA-55-8087-01A-11H-2240-13 |
| 148   | TCGA-53-7813-01A-11H-2169-13 | 198   | TCGA-55-8089-01A-11H-2240-13 |
| 149   | TCGA-53-A4EZ-01A-12H-A24S-13 | 199   | TCGA-55-8090-01A-11H-2240-13 |
| 150   | TCGA-55-1592-01A-01T-0947-13 | 200   | TCGA-55-8091-01A-11H-2240-13 |

| order | sample_id                    | order | sample_id                    |
|-------|------------------------------|-------|------------------------------|
| 201   | TCGA-55-8092-01A-11H-2240-13 | 251   | TCGA-62-A46Y-01A-11H-A24G-13 |
| 202   | TCGA-55-8094-01A-11H-2240-13 | 252   | TCGA-62-A470-01A-11H-A24G-13 |
| 203   | TCGA-55-8096-01A-11H-2240-13 | 253   | TCGA-62-A471-01A-12H-A24G-13 |
| 204   | TCGA-55-8097-01A-11H-2240-13 | 254   | TCGA-62-A472-01A-11H-A24G-13 |
| 205   | TCGA-55-8203-01A-11H-2240-13 | 255   | TCGA-64-1676-01A-01T-0947-13 |
| 206   | TCGA-55-8204-01A-11H-2240-13 | 256   | TCGA-64-1677-01A-01T-0947-13 |
| 207   | TCGA-55-8205-01A-11H-2240-13 | 257   | TCGA-64-1678-01A-01T-0947-13 |
| 208   | TCGA-55-8206-01A-11H-2240-13 | 258   | TCGA-64-1679-01A-21H-2065-13 |
| 209   | TCGA-55-8207-01A-11H-2240-13 | 259   | TCGA-64-1680-01A-02T-0947-13 |
| 210   | TCGA-55-8208-01A-11H-2240-13 | 260   | TCGA-64-1681-01A-11H-2065-13 |
| 211   | TCGA-55-8299-01A-11H-2286-13 | 261   | TCGA-64-5774-01A-01T-1627-13 |
| 212   | TCGA-55-8301-01A-11H-2286-13 | 262   | TCGA-64-5775-01A-01T-1627-13 |
| 213   | TCGA-55-8302-01A-11H-2325-13 | 263   | TCGA-64-5778-01A-01T-1627-13 |
| 214   | TCGA-55-8505-01A-11H-2402-13 | 264   | TCGA-64-5779-01A-01T-1627-13 |
| 215   | TCGA-55-8506-01A-11H-2402-13 | 265   | TCGA-64-5781-01A-01T-1627-13 |
| 216   | TCGA-55-8507-01A-11H-2402-13 | 266   | TCGA-64-5815-01A-01T-1627-13 |
| 217   | TCGA-55-8508-01A-11H-2402-13 | 267   | TCGA-67-3770-01A-01T-0947-13 |
| 218   | TCGA-55-8510-01A-11H-2402-13 | 268   | TCGA-67-3771-01A-01T-0947-13 |
| 219   | TCGA-55-8511-01A-11H-2402-13 | 269   | TCGA-67-3772-01A-01T-0947-13 |
| 220   | TCGA-55-8512-01A-11H-2402-13 | 270   | TCGA-67-3773-01A-01T-0947-13 |
| 221   | TCGA-55-8513-01A-11H-2402-13 | 271   | TCGA-67-3774-01A-01T-0947-13 |
| 222   | TCGA-55-8514-01A-11H-2402-13 | 272   | TCGA-67-4679-01B-01T-1754-13 |
| 223   | TCGA-55-8614-01A-11H-2402-13 | 273   | TCGA-67-6215-01A-11H-1754-13 |
| 224   | TCGA-55-8615-01A-11H-2402-13 | 274   | TCGA-67-6216-01A-11H-1754-13 |
| 225   | TCGA-55-8616-01A-11H-2402-13 | 275   | TCGA-67-6217-01A-11H-1754-13 |
| 226   | TCGA-55-8619-01A-11H-2402-13 | 276   | TCGA-69-7760-01A-11H-2169-13 |
| 227   | TCGA-55-8620-01A-11H-2402-13 | 277   | TCGA-69-7761-01A-11H-2169-13 |
| 228   | TCGA-55-8621-01A-11H-2402-13 | 278   | TCGA-69-7763-01A-11H-2169-13 |
| 229   | TCGA-55-A48X-01A-11H-A24G-13 | 279   | TCGA-69-7764-01A-11H-2169-13 |
| 230   | TCGA-55-A48Y-01A-11H-A24G-13 | 280   | TCGA-69-7765-01A-11H-2169-13 |
| 231   | TCGA-55-A48Z-01A-12H-A24S-13 | 281   | TCGA-69-7973-01A-11H-2186-13 |
| 232   | TCGA-55-A490-01A-11H-A24G-13 | 282   | TCGA-69-7974-01A-11H-2186-13 |
| 233   | TCGA-55-A491-01A-11H-A24G-13 | 283   | TCGA-69-7978-01A-11H-2186-13 |
| 234   | TCGA-55-A492-01A-11H-A24G-13 | 284   | TCGA-69-7979-01A-11H-2186-13 |
| 235   | TCGA-55-A493-01A-11H-A24G-13 | 285   | TCGA-69-7980-01A-11H-2186-13 |
| 236   | TCGA-55-A494-01A-11H-A24S-13 | 286   | TCGA-69-8253-01A-11H-2286-13 |
| 237   | TCGA-55-A4DF-01A-11H-A24G-13 | 287   | TCGA-69-8254-01A-11H-2286-13 |
| 238   | TCGA-55-A4DG-01A-11H-A24G-13 | 288   | TCGA-69-8255-01A-11H-2286-13 |
| 239   | TCGA-62-8394-01A-11H-2325-13 | 289   | TCGA-69-8453-01A-12H-2325-13 |
| 240   | TCGA-62-8395-01A-11H-2325-13 | 290   | TCGA-69-A59K-01A-11H-A263-13 |
| 241   | TCGA-62-8397-01A-11H-2325-13 | 291   | TCGA-71-6725-01A-11H-1857-13 |
| 242   | TCGA-62-8398-01A-11H-2325-13 | 292   | TCGA-71-8520-01A-11H-2402-13 |
| 243   | TCGA-62-8399-01A-21H-2325-13 | 293   | TCGA-73-4658-01A-01T-1754-13 |
| 244   | TCGA-62-8402-01A-11H-2325-13 | 294   | TCGA-73-4659-01A-01T-1207-13 |
| 245   | TCGA-62-A46O-01A-11H-A24G-13 | 295   | TCGA-73-4662-01A-01T-1207-13 |
| 246   | TCGA-62-A46P-01A-11H-A24G-13 | 296   | TCGA-73-4675-01A-01T-1207-13 |
| 247   | TCGA-62-A46R-01A-11H-A24G-13 | 297   | TCGA-73-4676-01A-01T-1754-13 |
| 248   | TCGA-62-A46S-01A-11H-A24G-13 | 298   | TCGA-73-7498-01A-12H-2186-13 |
| 249   | TCGA-62-A46U-01A-11H-A24G-13 | 299   | TCGA-73-7499-01A-11H-2186-13 |
| 250   | TCGA-62-A46V-01A-11H-A24G-13 | 300   | TCGA-75-5122-01A-01T-1754-13 |

| order | sample_id                    | order | sample_id                    |
|-------|------------------------------|-------|------------------------------|
| 301   | TCGA-75-5125-01A-01T-1754-13 | 351   | TCGA-80-5611-01A-01T-1627-13 |
| 302   | TCGA-75-5126-01A-01T-1754-13 | 352   | TCGA-83-5908-01A-21H-2286-13 |
| 303   | TCGA-75-5146-01A-01T-1627-13 | 353   | TCGA-86-6562-01A-11H-1754-13 |
| 304   | TCGA-75-5147-01A-01T-1627-13 | 354   | TCGA-86-6851-01A-11H-1948-13 |
| 305   | TCGA-75-6203-01A-11H-1754-13 | 355   | TCGA-86-7701-01A-11H-2169-13 |
| 306   | TCGA-75-6205-01A-11H-1754-13 | 356   | TCGA-86-7711-01A-11H-2065-13 |
| 307   | TCGA-75-6206-01A-11H-1754-13 | 357   | TCGA-86-7713-01A-11H-2065-13 |
| 308   | TCGA-75-6207-01A-11H-1754-13 | 358   | TCGA-86-7714-01A-12H-2169-13 |
| 309   | TCGA-75-6211-01A-11H-1754-13 | 359   | TCGA-86-7953-01A-11H-2186-13 |
| 310   | TCGA-75-6212-01A-11H-1754-13 | 360   | TCGA-86-7954-01A-11H-2186-13 |
| 311   | TCGA-75-6214-01A-41H-1948-13 | 361   | TCGA-86-7955-01A-11H-2186-13 |
| 312   | TCGA-75-7025-01A-12H-1948-13 | 362   | TCGA-86-8054-01A-11H-2240-13 |
| 313   | TCGA-75-7027-01A-11H-1948-13 | 363   | TCGA-86-8055-01A-11H-2240-13 |
| 314   | TCGA-75-7030-01A-11H-1948-13 | 364   | TCGA-86-8056-01A-11H-2240-13 |
| 315   | TCGA-75-7031-01A-11H-1948-13 | 365   | TCGA-86-8073-01A-11H-2240-13 |
| 316   | TCGA-78-7143-01A-11H-2038-13 | 366   | TCGA-86-8074-01A-11H-2240-13 |
| 317   | TCGA-78-7145-01A-11H-2038-13 | 367   | TCGA-86-8075-01A-11H-2240-13 |
| 318   | TCGA-78-7146-01A-11H-2038-13 | 368   | TCGA-86-8076-01A-31H-2240-13 |
| 319   | TCGA-78-7147-01A-11H-2038-13 | 369   | TCGA-86-8278-01A-11H-2286-13 |
| 320   | TCGA-78-7148-01A-11H-2038-13 | 370   | TCGA-86-8279-01A-11H-2286-13 |
| 321   | TCGA-78-7149-01A-11H-2038-13 | 371   | TCGA-86-8280-01A-11H-2286-13 |
| 322   | TCGA-78-7150-01A-21H-2038-13 | 372   | TCGA-86-8281-01A-11H-2286-13 |
| 323   | TCGA-78-7152-01A-11H-2038-13 | 373   | TCGA-86-8358-01A-11H-2325-13 |
| 324   | TCGA-78-7153-01A-11H-2038-13 | 374   | TCGA-86-8359-01A-11H-2325-13 |
| 325   | TCGA-78-7154-01A-11H-2038-13 | 375   | TCGA-86-8585-01A-11H-2402-13 |
| 326   | TCGA-78-7155-01A-11H-2038-13 | 376   | TCGA-86-8668-01A-11H-2402-13 |
| 327   | TCGA-78-7156-01A-11H-2038-13 | 377   | TCGA-86-8669-01A-11H-2402-13 |
| 328   | TCGA-78-7158-01A-11H-2038-13 | 378   | TCGA-86-8671-01A-11H-2402-13 |
| 329   | TCGA-78-7159-01A-11H-2038-13 | 379   | TCGA-86-8672-01A-21H-2402-13 |
| 330   | TCGA-78-7160-01A-11H-2038-13 | 380   | TCGA-86-8673-01A-11H-2402-13 |
| 331   | TCGA-78-7161-01A-11H-2038-13 | 381   | TCGA-86-8674-01A-21H-2402-13 |
| 332   | TCGA-78-7162-01A-21H-2065-13 | 382   | TCGA-86-A456-01A-11H-A24G-13 |
| 333   | TCGA-78-7163-01A-12H-2065-13 | 383   | TCGA-86-A4D0-01A-11H-A24G-13 |
| 334   | TCGA-78-7166-01A-12H-2065-13 | 384   | TCGA-86-A4JF-01A-11H-A24S-13 |
| 335   | TCGA-78-7167-01A-11H-2065-13 | 385   | TCGA-86-A4P7-01A-11H-A24S-13 |
| 336   | TCGA-78-7220-01A-11H-2038-13 | 386   | TCGA-86-A4P8-01A-11H-A24S-13 |
| 337   | TCGA-78-7535-01A-11H-2065-13 | 387   | TCGA-91-6828-01A-11H-1857-13 |
| 338   | TCGA-78-7536-01A-11H-2065-13 | 388   | TCGA-91-6829-01A-21H-1857-13 |
| 339   | TCGA-78-7537-01A-11H-2065-13 | 389   | TCGA-91-6830-01A-11H-1948-13 |
| 340   | TCGA-78-7539-01A-11H-2065-13 | 390   | TCGA-91-6831-01A-11H-1857-13 |
| 341   | TCGA-78-7540-01A-11H-2065-13 | 391   | TCGA-91-6835-01A-11H-1857-13 |
| 342   | TCGA-78-7542-01A-21H-2065-13 | 392   | TCGA-91-6836-01A-21H-1857-13 |
| 343   | TCGA-78-7633-01A-11H-2065-13 | 393   | TCGA-91-6840-01A-11H-1948-13 |
| 344   | TCGA-78-8640-01A-11H-2402-13 | 394   | TCGA-91-6847-01A-11H-1948-13 |
| 345   | TCGA-78-8648-01A-11H-2402-13 | 395   | TCGA-91-6848-01A-11H-1948-13 |
| 346   | TCGA-78-8655-01A-11H-2402-13 | 396   | TCGA-91-6849-01A-11H-1948-13 |
| 347   | TCGA-78-8660-01A-11H-2402-13 | 397   | TCGA-91-7771-01A-11H-2169-13 |
| 348   | TCGA-78-8662-01A-11H-2402-13 | 398   | TCGA-91-8496-01A-11H-2402-13 |
| 349   | TCGA-80-5607-01A-31H-1948-13 | 399   | TCGA-91-8497-01A-11H-2402-13 |
| 350   | TCGA-80-5608-01A-31H-1948-13 | 400   | TCGA-91-8499-01A-11H-2402-13 |

| order | sample_id                    | order | sample_id                    |
|-------|------------------------------|-------|------------------------------|
| 401   | TCGA-91-A4BC-01A-11R-A24G-13 | 451   | TCGA-99-8033-01A-11H-2240-13 |
| 402   | TCGA-91-A4BD-01A-11R-A24G-13 | 452   | TCGA-J2-8192-01A-11H-2240-13 |
| 403   | TCGA-93-7347-01A-11H-2186-13 | 453   | TCGA-J2-8194-01A-11H-2240-13 |
| 404   | TCGA-93-7348-01A-21H-2038-13 | 454   | TCGA-J2-A4AD-01A-11R-A24G-13 |
| 405   | TCGA-93-8067-01A-11H-2286-13 | 455   | TCGA-J2-A4AE-01A-21R-A24G-13 |
| 406   | TCGA-93-A4JN-01A-11H-A24S-13 | 456   | TCGA-J2-A4AG-01A-11H-A24G-13 |
| 407   | TCGA-93-A4JO-01A-21H-A24S-13 | 457   | TCGA-L4-A4E5-01A-11H-A24S-13 |
| 408   | TCGA-93-A4JP-01A-11H-A24S-13 | 458   | TCGA-L4-A4E6-01A-11R-A24G-13 |
| 409   | TCGA-93-A4JQ-01A-11H-A24S-13 | 459   | TCGA-L9-A443-01A-12H-A24G-13 |
| 410   | TCGA-95-7039-01A-11H-1948-13 | 460   | TCGA-L9-A444-01A-21H-A24G-13 |
| 411   | TCGA-95-7043-01A-11H-1948-13 | 461   | TCGA-MN-A4N1-01A-11H-A24S-13 |
| 412   | TCGA-95-7562-01A-11H-2240-13 | 462   | TCGA-MN-A4N4-01A-12H-A24S-13 |
| 413   | TCGA-95-7567-01A-11H-2065-13 | 463   | TCGA-MN-A4N5-01A-11H-A24S-13 |
| 414   | TCGA-95-7944-01A-11H-2186-13 | 464   | TCGA-MP-A4SV-01A-11H-A24S-13 |
| 415   | TCGA-95-7947-01A-11H-2186-13 | 465   | TCGA-MP-A4SW-01A-21H-A24S-13 |
| 416   | TCGA-95-7948-01A-11H-2186-13 | 466   | TCGA-MP-A4SY-01A-21H-A24S-13 |
| 417   | TCGA-95-8039-01A-11H-2240-13 | 467   | TCGA-MP-A4T2-01A-11H-A24S-13 |
| 418   | TCGA-95-8494-01A-11H-2325-13 | 468   | TCGA-MP-A4T4-01A-11H-A263-13 |
| 419   | TCGA-95-A4VK-01A-11H-A263-13 | 469   | TCGA-MP-A4T6-01A-32H-A263-13 |
| 420   | TCGA-95-A4VN-01A-11H-A263-13 | 470   | TCGA-MP-A4T7-01A-11H-A24S-13 |
| 421   | TCGA-95-A4VP-01A-21H-A263-13 | 471   | TCGA-MP-A4T8-01A-11H-A24S-13 |
| 422   | TCGA-97-7546-01A-11H-2038-13 | 472   | TCGA-MP-A4T9-01A-11H-A24S-13 |
| 423   | TCGA-97-7547-01A-11H-2038-13 | 473   | TCGA-MP-A4TA-01A-21H-A24S-13 |
| 424   | TCGA-97-7552-01A-11H-2038-13 | 474   | TCGA-MP-A4TC-01A-11H-A24S-13 |
| 425   | TCGA-97-7553-01A-21H-2038-13 | 475   | TCGA-MP-A4TD-01A-32H-A263-13 |
| 426   | TCGA-97-7554-01A-11H-2038-13 | 476   | TCGA-MP-A4TE-01A-22H-A263-13 |
| 427   | TCGA-97-7937-01A-11H-2169-13 | 477   | TCGA-MP-A4TF-01A-11H-A263-13 |
| 428   | TCGA-97-7938-01A-11H-2169-13 | 478   | TCGA-MP-A4TH-01A-31H-A263-13 |
| 429   | TCGA-97-7941-01A-11H-2186-13 | 479   | TCGA-MP-A4TI-01A-21H-A24S-13 |
| 430   | TCGA-97-8171-01A-11H-2286-13 | 480   | TCGA-MP-A4TJ-01A-51H-A263-13 |
| 431   | TCGA-97-8172-01A-11H-2286-13 | 481   | TCGA-MP-A4TK-01A-11H-A24S-13 |
| 432   | TCGA-97-8174-01A-11H-2286-13 | 482   | TCGA-MP-A5C7-01A-11H-A263-13 |
| 433   | TCGA-97-8175-01A-11H-2286-13 | 483   | TCGA-NJ-A4YF-01A-12H-A263-13 |
| 434   | TCGA-97-8176-01A-11H-2402-13 | 484   | TCGA-NJ-A4YG-01A-22H-A263-13 |
| 435   | TCGA-97-8177-01A-11H-2286-13 | 485   | TCGA-NJ-A4YI-01A-11H-A263-13 |
| 436   | TCGA-97-8179-01A-11H-2286-13 | 486   | TCGA-NJ-A4YP-01A-11H-A263-13 |
| 437   | TCGA-97-8547-01A-11H-2402-13 | 487   | TCGA-NJ-A4YQ-01A-11H-A263-13 |
| 438   | TCGA-97-8552-01A-11H-2402-13 | 488   | TCGA-NJ-A55A-01A-11H-A263-13 |
| 439   | TCGA-97-A4LX-01A-11H-A24S-13 | 489   | TCGA-NJ-A55O-01A-11H-A263-13 |
| 440   | TCGA-97-A4M0-01A-11H-A24S-13 | 490   | TCGA-NJ-A55R-01A-11H-A263-13 |
| 441   | TCGA-97-A4M1-01A-11H-A24S-13 | 491   | TCGA-O1-A52J-01A-11H-A263-13 |
| 442   | TCGA-97-A4M2-01A-12H-A24S-13 |       |                              |
| 443   | TCGA-97-A4M3-01A-11H-A24S-13 |       |                              |
| 444   | TCGA-97-A4M5-01A-11H-A24S-13 |       |                              |
| 445   | TCGA-97-A4M6-01A-11H-A24S-13 |       |                              |
| 446   | TCGA-97-A4M7-01A-11H-A24S-13 |       |                              |
| 447   | TCGA-99-7458-01A-11H-2038-13 |       |                              |
| 448   | TCGA-99-8025-01A-11H-2240-13 |       |                              |
| 449   | TCGA-99-8028-01A-11H-2240-13 |       |                              |
| 450   | TCGA-99-8032-01A-11H-2240-13 |       |                              |
