# Supplementary material for: deGPS is a powerful tool for detecting differential expression in RNA-sequencing studies
Source: PubMed Central journal article supplement (PMC4465298; doi:10.1186/s12864-015-1676-0), 2015-06-13
Supplement: 12864_2015_1676_MOESM2_ESM.pdf [file 12864_2015_1676_MOESM2_ESM.pdf]

**Table S2** TCGA samples used in mRNA-Seq simulations.

| order | sample_id                    | order | sample_id                    |
|-------|------------------------------|-------|------------------------------|
| 1     | TCGA-38-4625-11A-01R-1758-07 | 51    | TCGA-L9-A443-01A-12R-A24H-07 |
| 2     | TCGA-38-4626-11A-01R-1758-07 | 52    | TCGA-62-A460-01A-11R-A24H-07 |
| 3     | TCGA-38-4627-11A-01R-1758-07 | 53    | TCGA-62-A46P-01A-11R-A24H-07 |
| 4     | TCGA-38-4632-11A-01R-1755-07 | 54    | TCGA-93-A4JO-01A-21R-A24X-07 |
| 5     | TCGA-44-2655-11A-01R-1758-07 | 55    | TCGA-97-A4M3-01A-11R-A24X-07 |
| 6     | TCGA-44-2657-11A-01R-1758-07 | 56    | TCGA-97-A4M2-01A-12R-A24X-07 |
| 7     | TCGA-44-2661-11A-01R-1758-07 | 57    | TCGA-97-A4M7-01A-11R-A24X-07 |
| 8     | TCGA-44-2662-11A-01R-1758-07 | 58    | TCGA-97-A4LX-01A-11R-A24X-07 |
| 9     | TCGA-44-2665-11A-01R-1758-07 | 59    | TCGA-50-5933-11A-01R-1755-07 |
| 10    | TCGA-44-2668-11A-01R-1758-07 | 60    | TCGA-93-A4JQ-01A-11R-A24X-07 |
| 11    | TCGA-44-3396-11A-01R-1758-07 | 61    | TCGA-MN-A4N1-01A-11R-A24X-07 |
| 12    | TCGA-44-5645-11A-01R-1628-07 | 62    | TCGA-L4-A4E5-01A-11R-A24X-07 |
| 13    | TCGA-44-6144-11A-01R-1755-07 | 63    | TCGA-97-A4M0-01A-11R-A24X-07 |
| 14    | TCGA-44-6145-11A-01R-1858-07 | 64    | TCGA-55-A494-01A-11R-A24X-07 |
| 15    | TCGA-44-6146-11A-01R-1858-07 | 65    | TCGA-MP-A4T9-01A-11R-A24X-07 |
| 16    | TCGA-44-6147-11A-01R-1858-07 | 66    | TCGA-MN-A4N4-01A-12R-A24X-07 |
| 17    | TCGA-44-6148-11A-01R-1858-07 | 67    | TCGA-MP-A4SW-01A-21R-A24X-07 |
| 18    | TCGA-44-6776-11A-01R-1858-07 | 68    | TCGA-93-A4JN-01A-11R-A24X-07 |
| 19    | TCGA-44-6778-11A-01R-1858-07 | 69    | TCGA-55-A48Z-01A-12R-A24X-07 |
| 20    | TCGA-49-4490-11A-01R-1858-07 | 70    | TCGA-MP-A4TK-01A-11R-A24X-07 |
| 21    | TCGA-49-4512-11A-01R-1858-07 | 71    | TCGA-44-A4SS-01A-11R-A24X-07 |
| 22    | TCGA-49-6742-11A-01R-1858-07 | 72    | TCGA-55-6971-11A-01R-1949-07 |
| 23    | TCGA-49-6743-11A-01R-1858-07 | 73    | TCGA-93-A4JP-01A-11R-A24X-07 |
| 24    | TCGA-49-6761-11A-01R-1949-07 | 74    | TCGA-55-6970-11A-01R-1949-07 |
| 25    | TCGA-50-5930-11A-01R-1755-07 | 75    | TCGA-97-A4M6-01A-11R-A24X-07 |
| 26    | TCGA-50-5931-11A-01R-1858-07 | 76    | TCGA-49-6745-11A-01R-1858-07 |
| 27    | TCGA-50-5935-11A-01R-1858-07 | 77    | TCGA-MP-A4TA-01A-21R-A24X-07 |
| 28    | TCGA-50-5936-11A-01R-1628-07 | 78    | TCGA-MN-A4N5-01A-11R-A24X-07 |
| 29    | TCGA-50-5939-11A-01R-1628-07 | 79    | TCGA-MP-A4SV-01A-21R-A24X-07 |
| 30    | TCGA-50-6595-11A-01R-1858-07 | 80    | TCGA-55-A492-01A-11R-A24H-07 |
| 31    | TCGA-55-6968-11A-01R-1949-07 | 81    | TCGA-MP-A4T7-01A-11R-A24X-07 |
| 32    | TCGA-55-6969-11A-01R-1949-07 | 82    | TCGA-53-A4EZ-01A-12R-A24X-07 |
| 33    | TCGA-55-6972-11A-01R-1949-07 | 83    | TCGA-62-A46R-01A-11R-A24H-07 |
| 34    | TCGA-55-6975-11A-01R-1949-07 | 84    | TCGA-91-6849-11A-01R-1949-07 |
| 35    | TCGA-55-6978-11A-01R-1949-07 | 85    | TCGA-86-A4P7-01A-11R-A24X-07 |
| 36    | TCGA-55-6979-11A-01R-1949-07 | 86    | TCGA-44-6777-11A-01R-1858-07 |
| 37    | TCGA-55-6980-11A-01R-1949-07 | 87    | TCGA-MP-A4T8-01A-11R-A24X-07 |
| 38    | TCGA-55-6981-11A-01R-1949-07 | 88    | TCGA-86-A4JF-01A-11R-A24X-07 |
| 39    | TCGA-55-6982-11A-01R-1949-07 | 89    | TCGA-55-A4DG-01A-11R-A24H-07 |
| 40    | TCGA-55-6983-11A-01R-1949-07 | 90    | TCGA-MP-A4SV-01A-11R-A24X-07 |
| 41    | TCGA-55-6984-11A-01R-1949-07 | 91    | TCGA-86-A4P8-01A-11R-A24X-07 |
| 42    | TCGA-55-6985-11A-01R-1949-07 | 92    | TCGA-L9-A444-01A-21R-A24H-07 |
| 43    | TCGA-55-6986-11A-01R-1949-07 | 93    | TCGA-MP-A4TI-01A-21R-A24X-07 |
| 44    | TCGA-73-4676-11A-01R-1755-07 | 94    | TCGA-50-5932-11A-01R-1755-07 |
| 45    | TCGA-91-6828-11A-01R-1858-07 | 95    | TCGA-L4-A4E6-01A-11R-A24H-07 |
| 46    | TCGA-91-6829-11A-01R-1858-07 | 96    | TCGA-49-6744-11A-01R-1858-07 |
| 47    | TCGA-91-6831-11A-02R-1858-07 | 97    | TCGA-97-A4M1-01A-11R-A24X-07 |
| 48    | TCGA-91-6835-11A-01R-1858-07 | 98    | TCGA-MP-A4TC-01A-11R-A24X-07 |
| 49    | TCGA-91-6836-11A-01R-1858-07 | 99    | TCGA-44-A4SU-01A-11R-A24X-07 |
| 50    | TCGA-91-6847-11A-01R-1949-07 | 100   | TCGA-97-A4M5-01A-11R-A24X-07 |

Note: TCGA-62-A46O is used for plotting Figure 1.
