# Supplementary material for: deGPS is a powerful tool for detecting differential expression in RNA-sequencing studies
Source: PubMed Central journal article supplement (PMC4465298; doi:10.1186/s12864-015-1676-0), 2015-06-13

**Figure S4. AUC of edgeR with different parameter settings.** Methods in red font are those inflate type I error and/or false discovery rate.

**(A) miRNA**

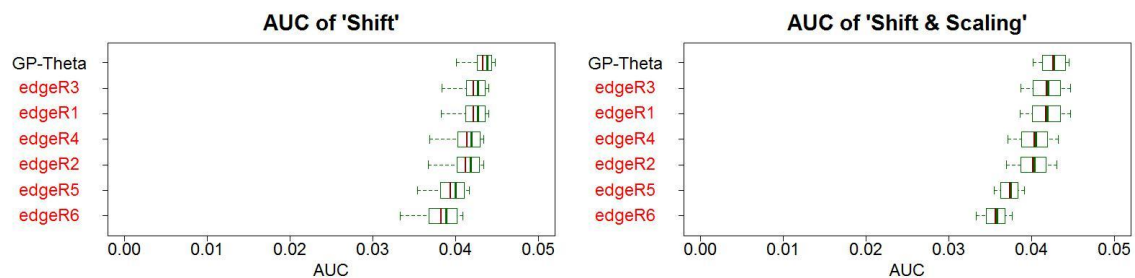

**(B) mRNA**

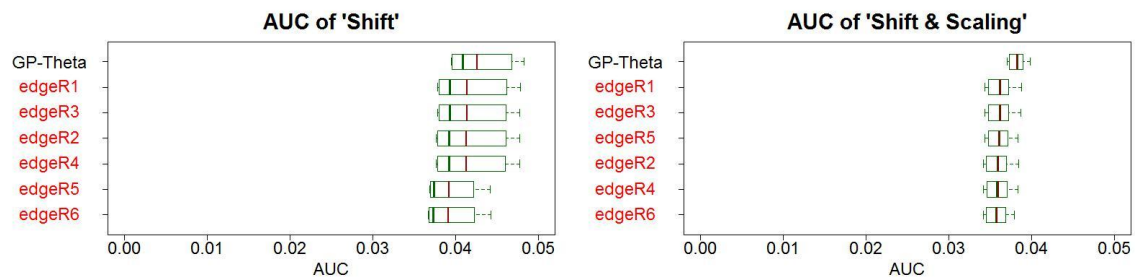

Supplement: 12864_2015_1676_MOESM7_ESM.pdf [file 12864_2015_1676_MOESM7_ESM.pdf]
