# Supplementary material for: deGPS is a powerful tool for detecting differential expression in RNA-sequencing studies
Source: PubMed Central journal article supplement (PMC4465298; doi:10.1186/s12864-015-1676-0), 2015-06-13

**Figure S5. Simulation results from compcodeR.** Sample size was set as 8 subjects per group. Note that edgeR2 does not control correct type I error when increasing sample size although its FDR is at the desired level.

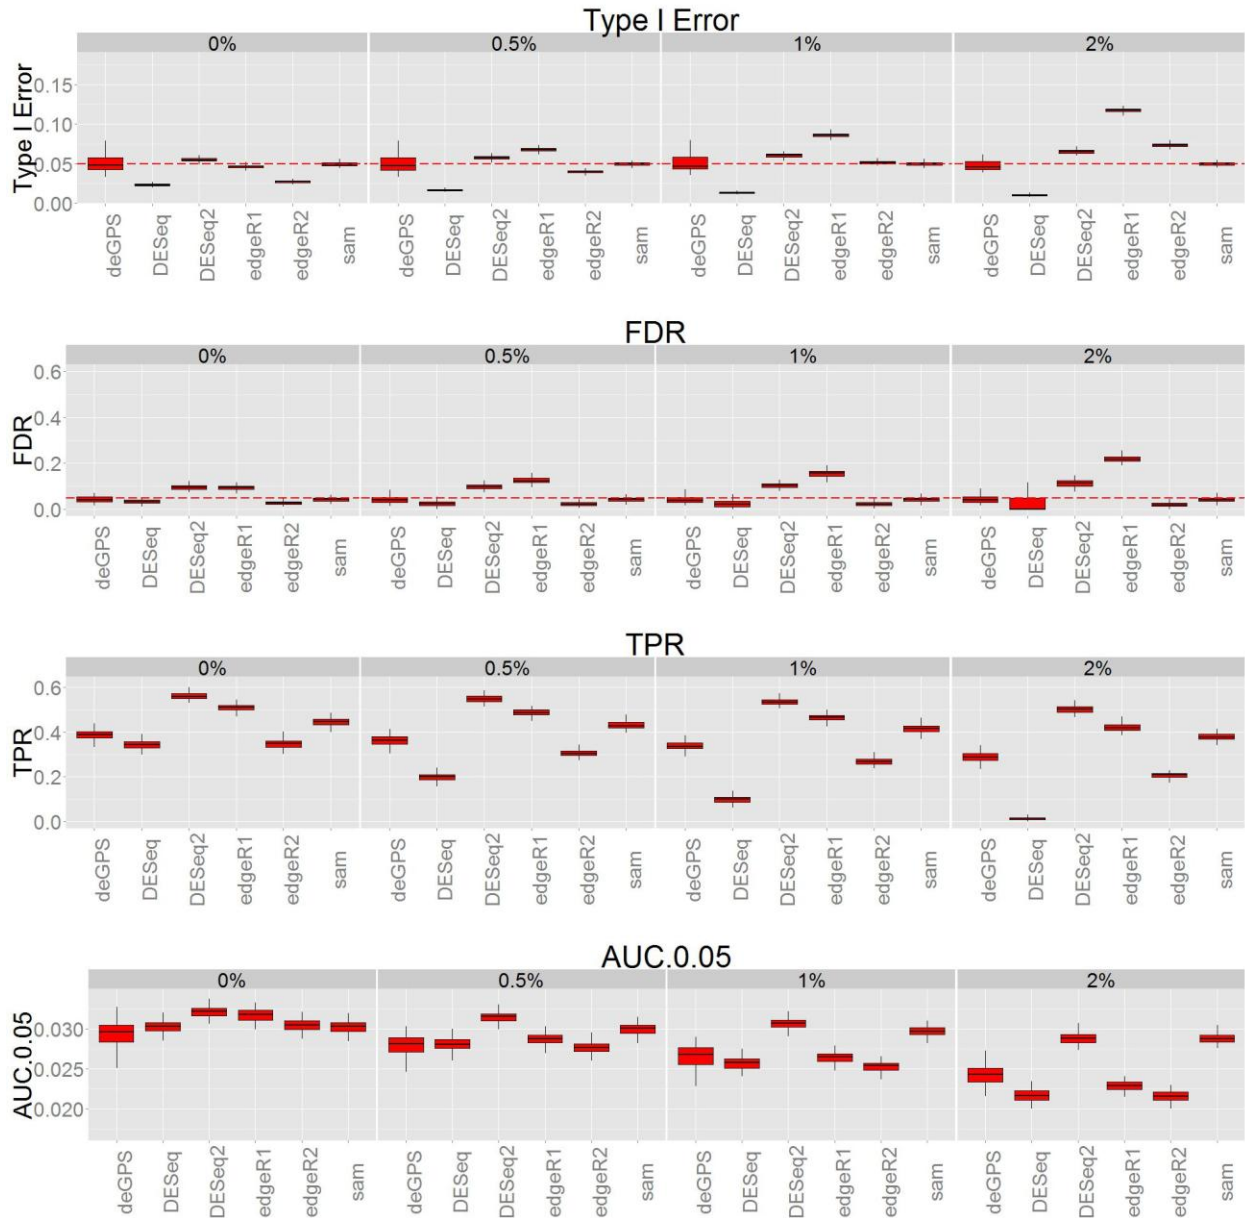

Supplement: 12864_2015_1676_MOESM8_ESM.pdf [file 12864_2015_1676_MOESM8_ESM.pdf]
