# Supplementary material for: deGPS is a powerful tool for detecting differential expression in RNA-sequencing studies
Source: PubMed Central journal article supplement (PMC4465298; doi:10.1186/s12864-015-1676-0), 2015-06-13

**Figure S6**-Effects of different FDR adjustment methods and T-statistics on the performance on deGPS. Sample sizes were set as (A) 5 and (B) 8 subjects per group. The default FDR adjustment of deGPS is BH method; two additional FDR adjustments QVAL and LFDR were evaluated. The default statistic of deGPS is ordinary T-statistic in permutations; regularized T-statistic (st) was evaluated.

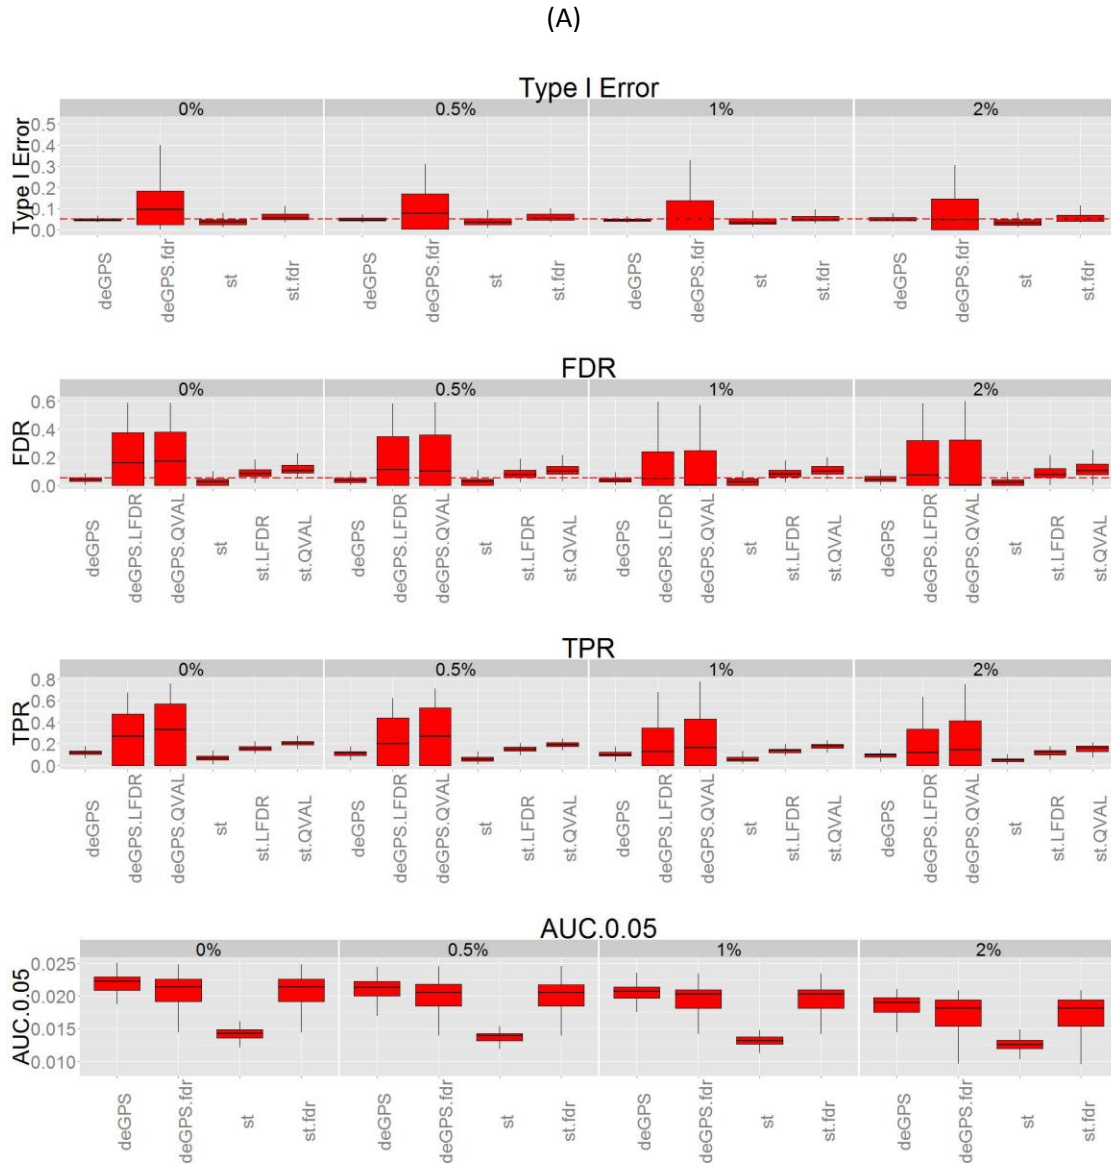

(B)

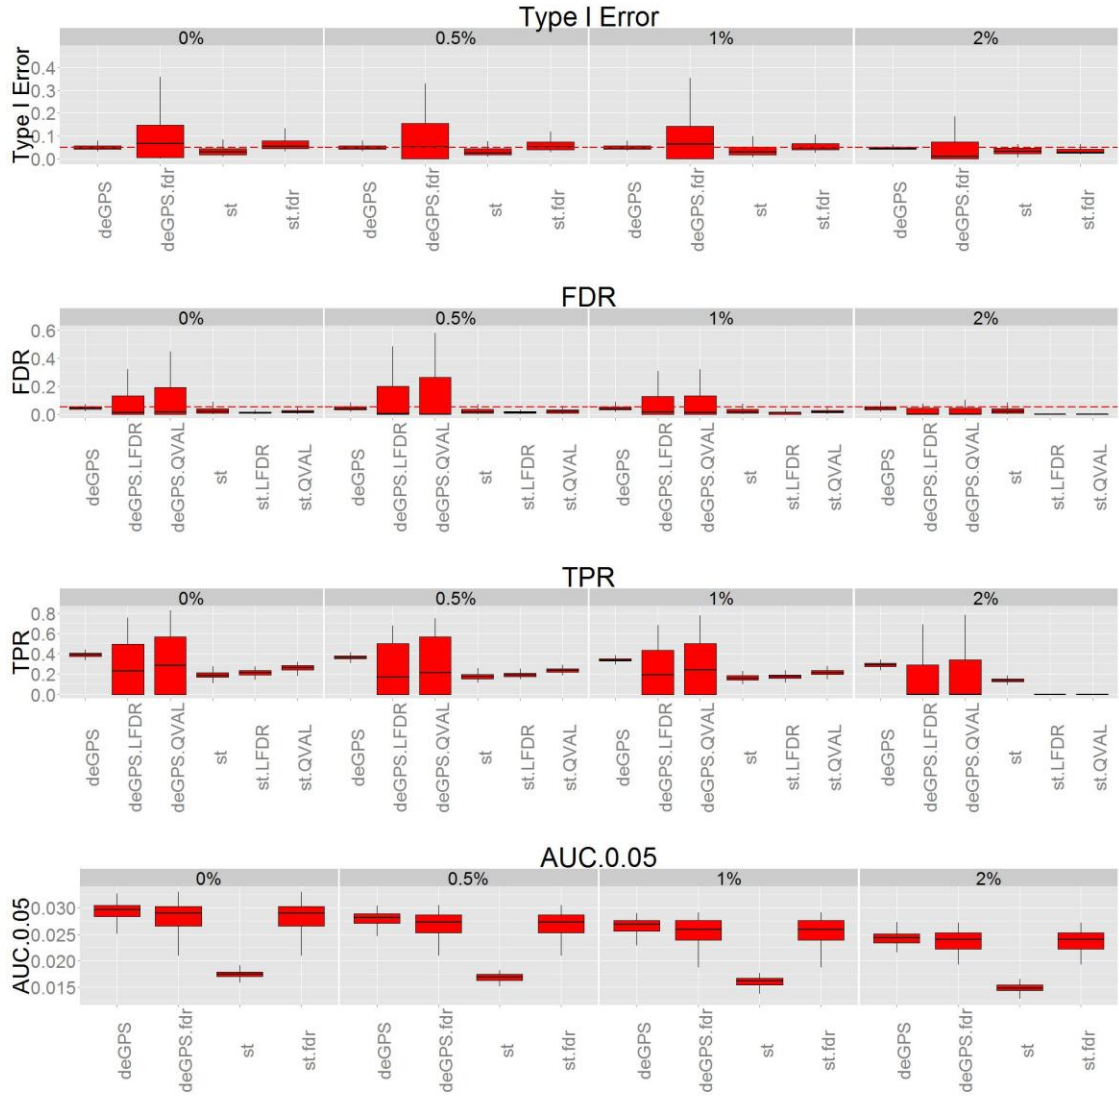

Supplement: 12864_2015_1676_MOESM9_ESM.pdf [file 12864_2015_1676_MOESM9_ESM.pdf]
