# Supplementary material for: deGPS is a powerful tool for detecting differential expression in RNA-sequencing studies
Source: PubMed Central journal article supplement (PMC4465298; doi:10.1186/s12864-015-1676-0), 2015-06-13

**Figure S7. Genes differentially expressed between any two non-adjacent developmental stages of *Drosophila melanogaster***

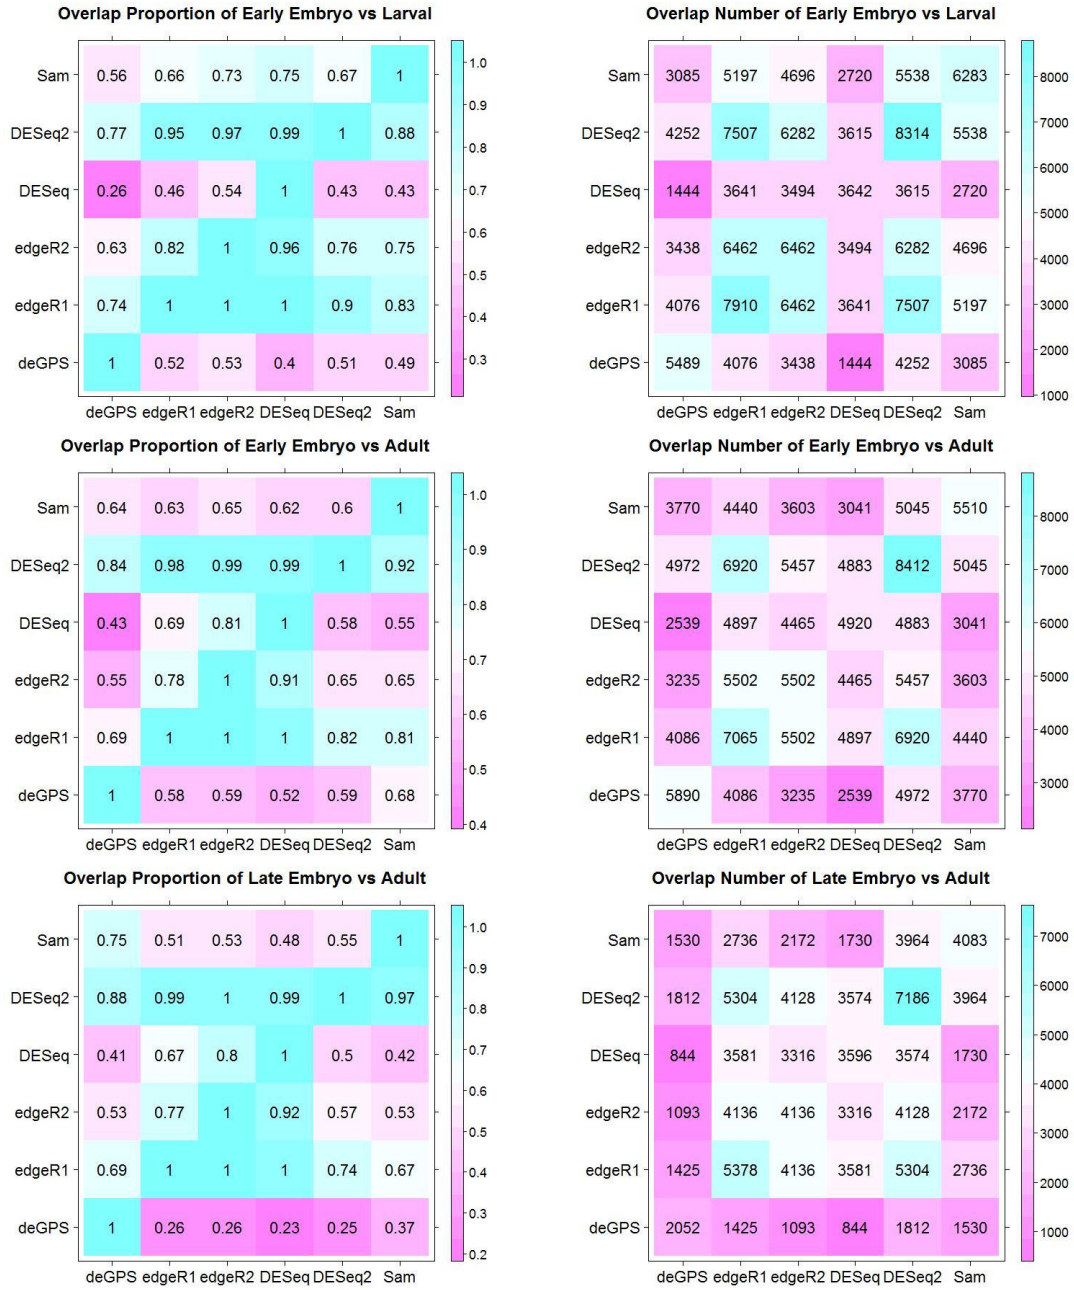

Supplement: 12864_2015_1676_MOESM10_ESM.pdf [file 12864_2015_1676_MOESM10_ESM.pdf]
