# Supplementary material for: deGPS is a powerful tool for detecting differential expression in RNA-sequencing studies
Source: PubMed Central journal article supplement (PMC4465298; doi:10.1186/s12864-015-1676-0), 2015-06-13

**Figure S10. Overdispersion of sequence count data in RNA-Seq. (A)** Histogram of  $1/(1 - \hat{\lambda})$  (in logarithm scale), and **(B)** Sample variance is far away from its mean. Sequence count data were fitted with GP distribution for each sample from TCGA.  $1/(1 - \hat{\lambda})$  measures the extent of the departure of the data from Poisson distribution.

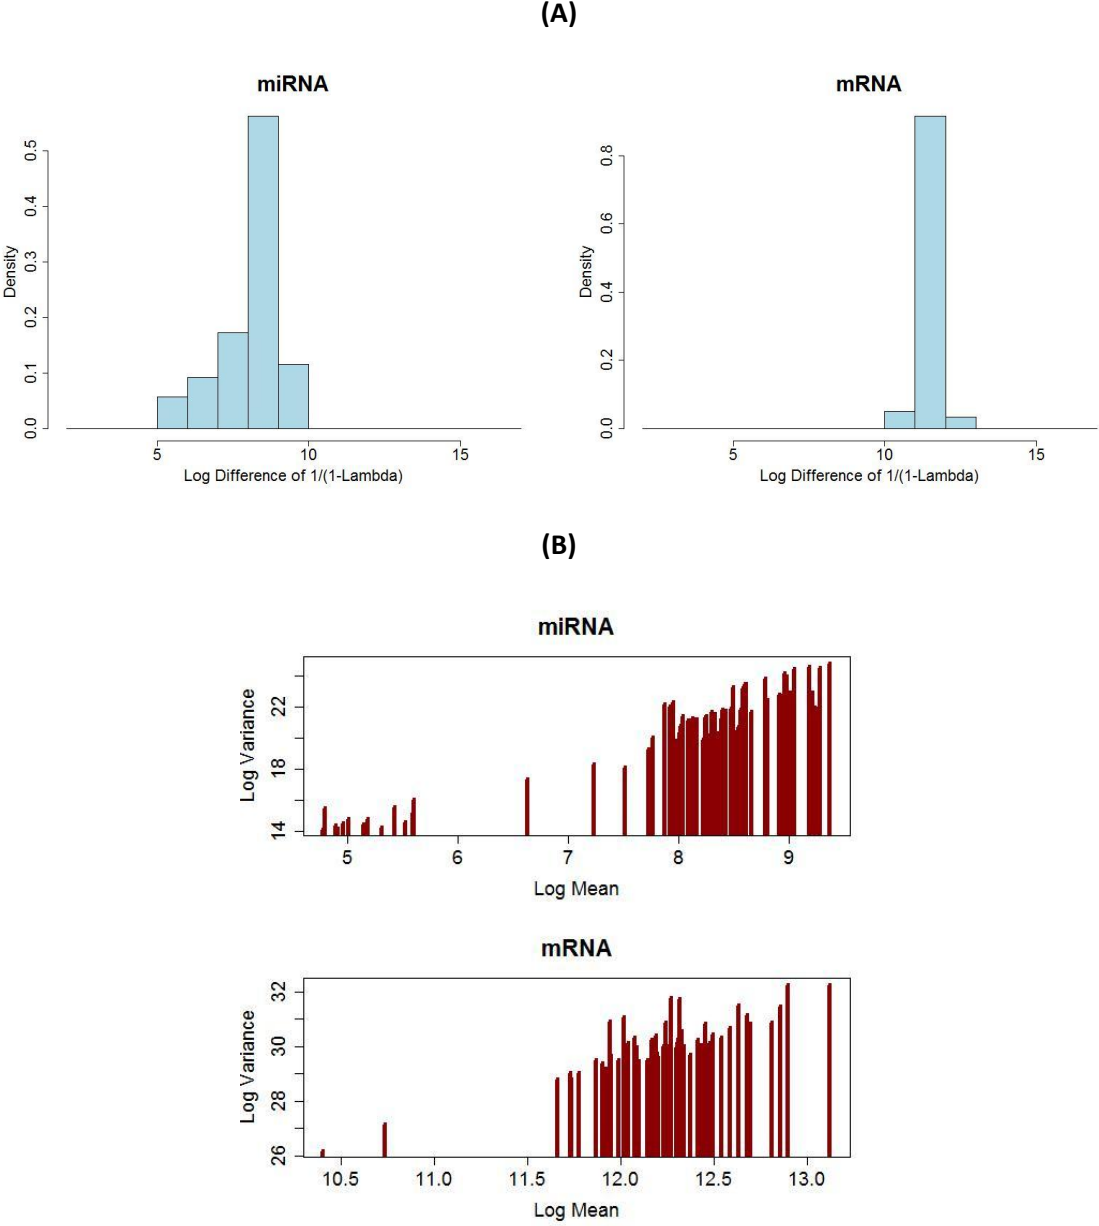

Supplement: 12864_2015_1676_MOESM13_ESM.pdf [file 12864_2015_1676_MOESM13_ESM.pdf]
