# Supplementary material for: deGPS is a powerful tool for detecting differential expression in RNA-sequencing studies
Source: PubMed Central journal article supplement (PMC4465298; doi:10.1186/s12864-015-1676-0), 2015-06-13
Supplement: 12864_2015_1676_MOESM14_ESM.pdf [file 12864_2015_1676_MOESM14_ESM.pdf]

**Table S3.** Running times of different R packages for analyzing the development transcriptome of *Drosophila*

| <b>deGPS</b>           |                 | <b>DESeq*</b> | <b>DESeq2</b> | <b>edgeR</b>  | <b>SAMseq</b> |
|------------------------|-----------------|---------------|---------------|---------------|---------------|
| <b>Number of cores</b> | <b>Runtime</b>  | <b>14 min</b> | <b>14 sec</b> | <b>10 sec</b> | <b>15 sec</b> |
| <b>1</b>               | <b>37.6 min</b> |               |               |               |               |
| <b>4</b>               | <b>10.3 min</b> |               |               |               |               |
| <b>8</b>               | <b>5.4 min</b>  |               |               |               |               |
| <b>16</b>              | <b>3.1 min</b>  |               |               |               |               |

\*Note: DESeq, DESeq2 and edgeR do not use parallel computation and thus one core was used in their analyses.
